# Supplementary material for: A Comparison of Interpolyelectrolyte Complexes (IPECs) Made from Anionic Block Copolymer Micelles and PDADMAC or q-Chitosan as Polycation
Source: MDPI journal article supplement (doi:10.3390/polym15092204), 2023-05-06
Supplement: s1 [file s1]

# A Comparison of Interpolyelectrolyte Complexes (IPECs) Made from Anionic Block Copolymer Micelles and PDADMAC or q-Chitosan as Polycation

Özge Azeri<sup>1\*</sup>, Dennis Schönfeld<sup>1</sup>, Bin Dai<sup>1</sup>, Uwe Keiderling<sup>2</sup>, Laurence Noirez<sup>3</sup>, Michael Gradzielski<sup>1\*</sup>

1: Stranski-Laboratorium für Physikalische und Theoretische Chemie, Institut für Chemie, Technische Universität Berlin, D-10623 Berlin, Germany

2: Helmholtz-Zentrum Berlin (HZB) für Materialien und Energie GmbH, Berlin, Germany

3: Laboratoire Léon Brillouin CEA-CNRS, Université Paris-Saclay, F-91191 Gif-sur-Yvette Cedex, France

## Supplementary Information

### 1. Zeta-potential

**Table S1.** Zeta Potential of the complexes of Bu40 and Do36s with q-chitosan and PDADMAC at different charge ratio  $z$ .

| $z = [+]/[-]$ | Zeta Potential, $\zeta$ [mV] |       |                   |       |
|---------------|------------------------------|-------|-------------------|-------|
|               | q-Chitosan Complexes         |       | PDADMAC Complexes |       |
|               | Bu40                         | Do36s | Bu40              | Do36s |
| $z = 0$       | -38.5                        | -35.4 | -38.5             | -35.4 |
| $z = 0.2$     | -39.9                        | -34.8 | -39.4             | -35.9 |
| $z = 0.4$     | -24.8                        | -29.7 | -35.7             | -31.1 |

### 2. MW of the Complexes from Turbidity (UV) and SLS experiments

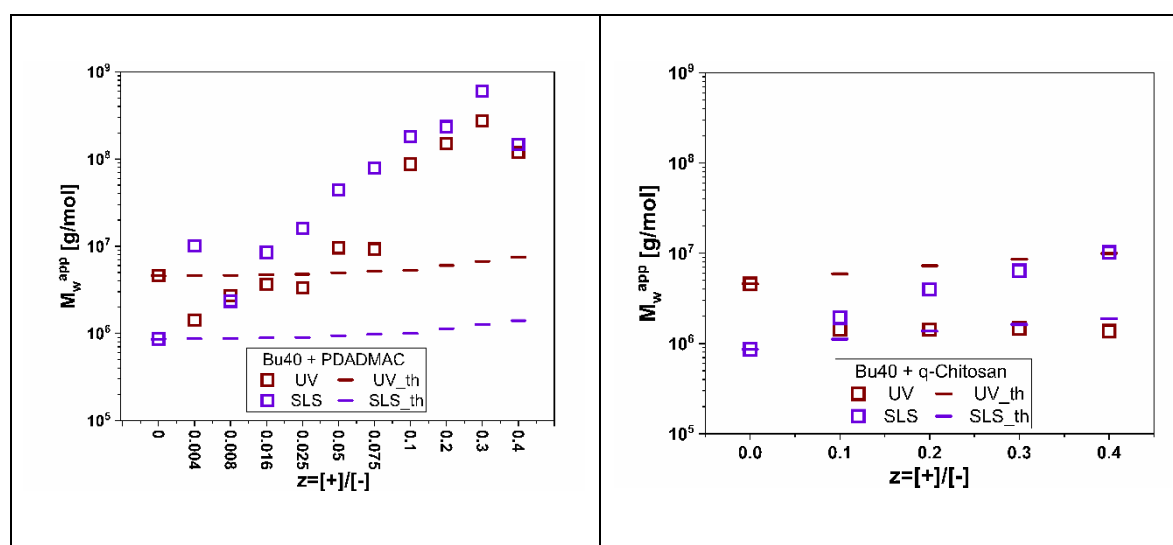

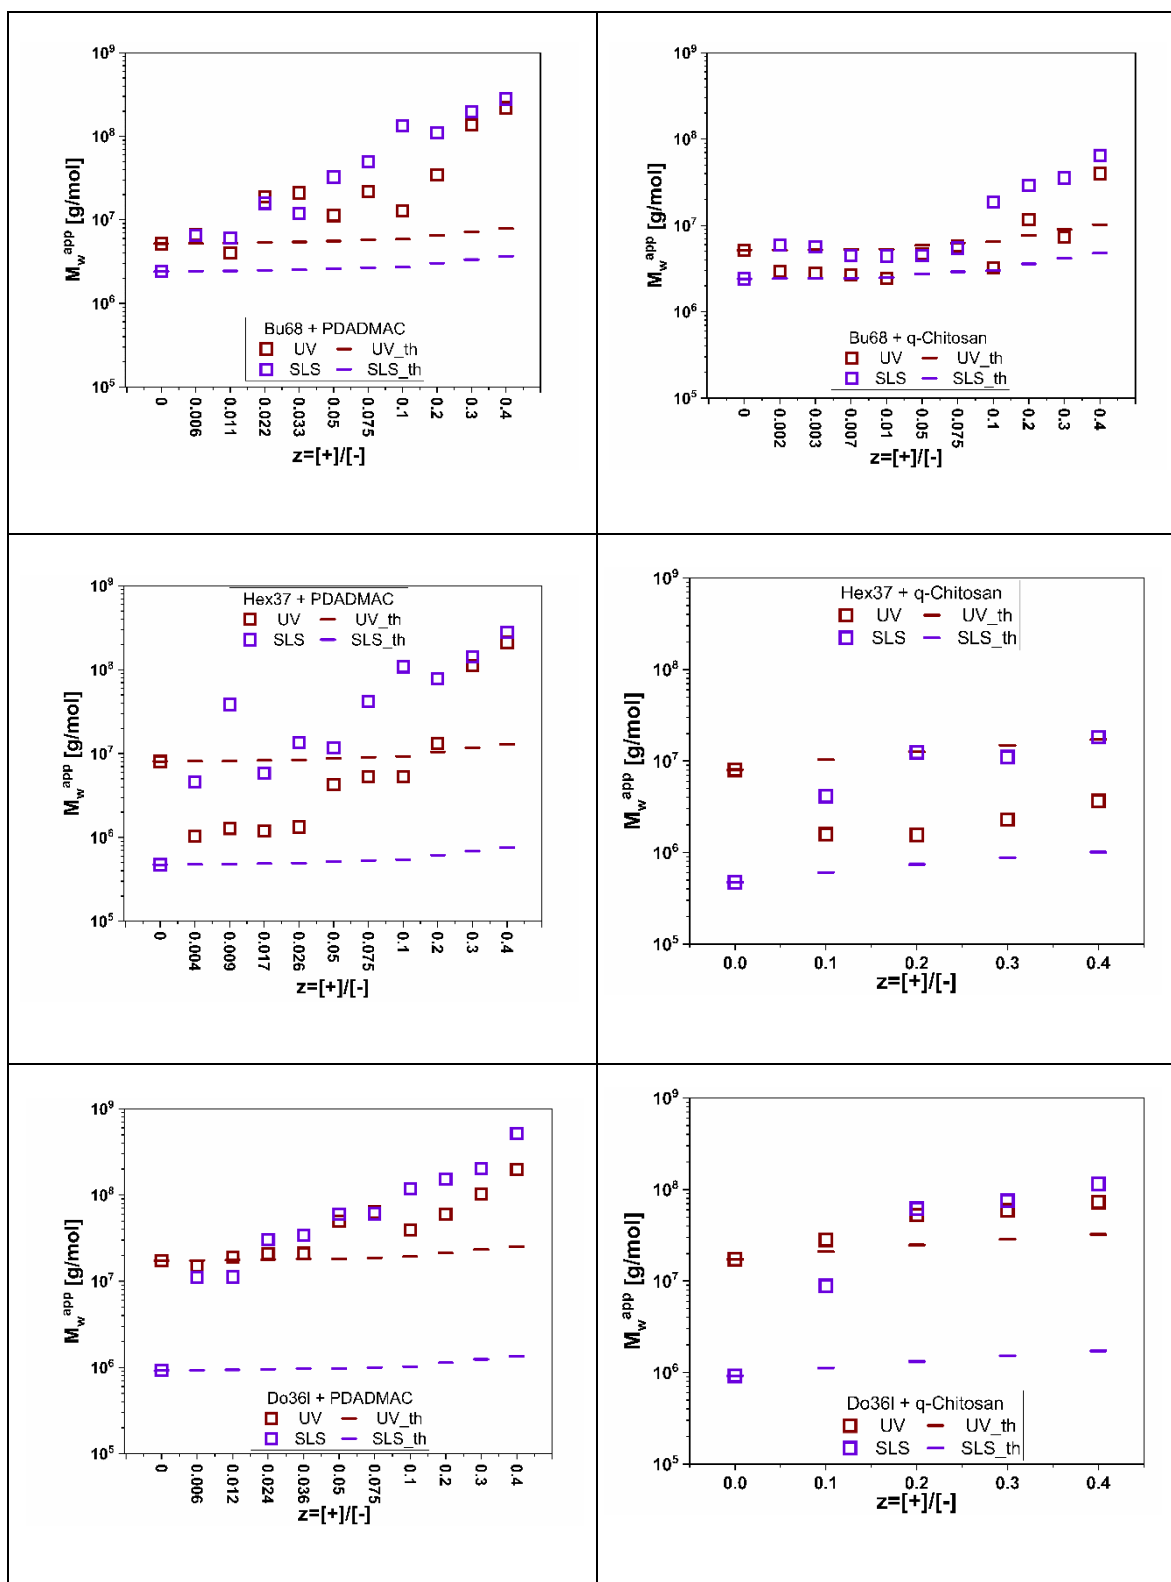

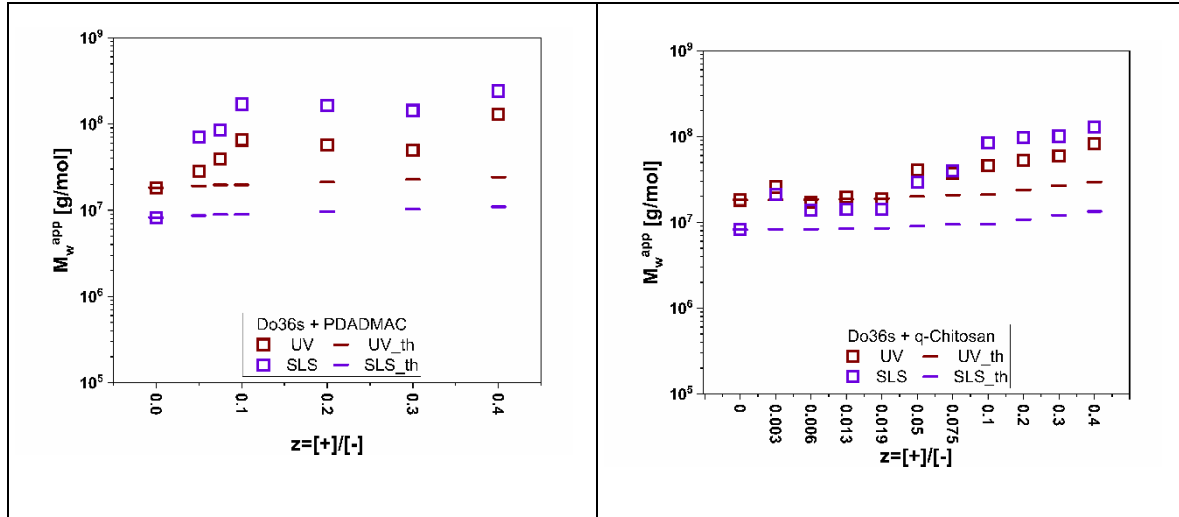

**Figure S1.** Direct comparison of the  $M_w^{app}$  values for the different copolymers upon complexation with PDADMAC (left) or q-chit (right) obtained from the turbidity and the static light scattering measurements. The theoretical Molecular Weight values are show as UV\_th and SLS\_th. The theoretical Mw values were calculated with the assumption that the micelle size remains constant and the corresponding amount of polycation is simply complexing these micelles.

### 3. Static Light Scattering

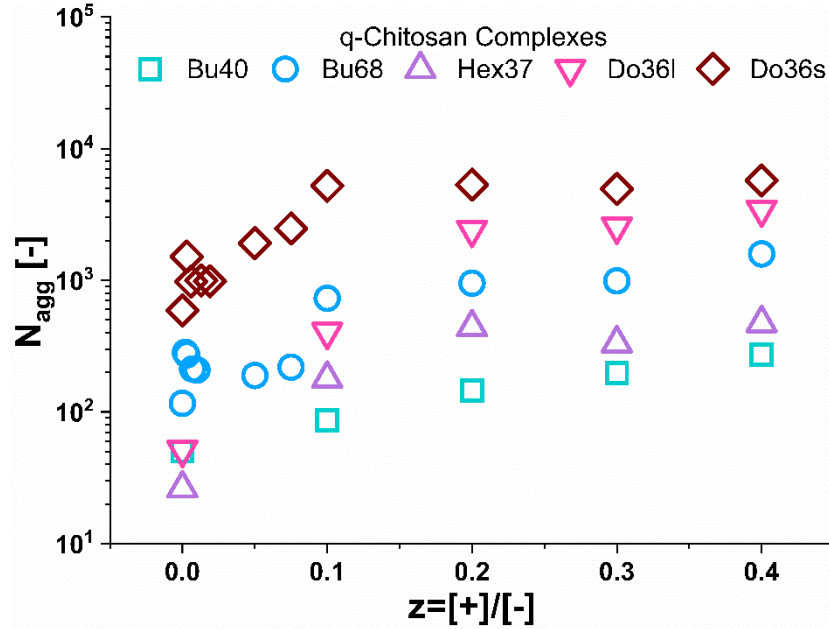

(a)

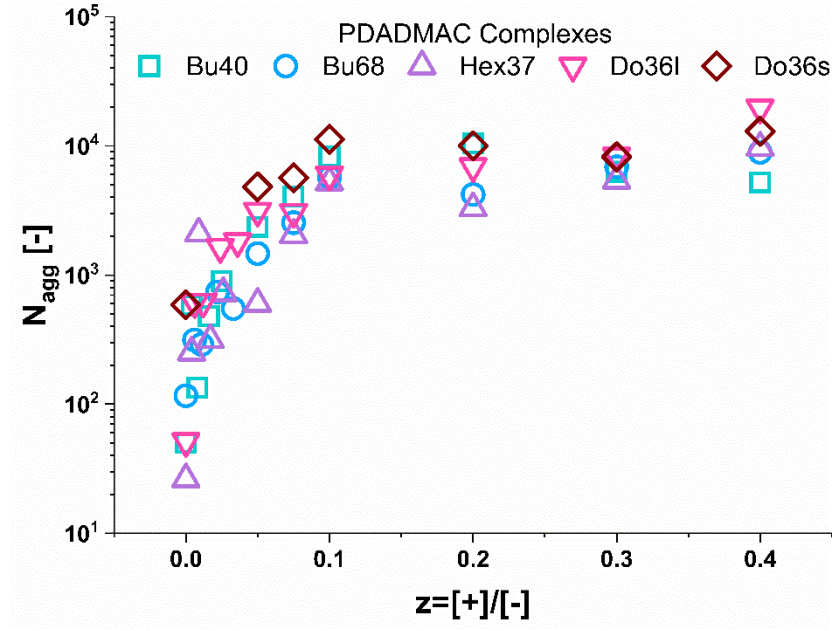

(b)

**Figure S2.** The aggregation number of polyanion of the IPECs obtained by complexing solutions of AlkA-b-NaPa with different amounts of polycation (a) q-Chitosan or (b) PDADMAC via SLS.

#### 4. Refractive index increment $dn/dc$

$dn/dc$  of the complexes were calculated via

$$\left(\frac{dn}{dc}\right)_{IPEC} = \sum_i \left( \left(\frac{dn}{dc}\right)_i * \phi_i \right) \quad (S1)$$

$\phi_i$  volume fraction of Polyanion or Polyanion in corresponding complex.

**Table S2.** Refractive index increment  $dn/dc$  of the different polymers at 25 °C measured at 620 nm.

| Polymer        | $dn/dc$ [mL/g] |
|----------------|----------------|
| Bu40           | 0.149          |
| Bu68           | 0.154          |
| Hex37          | 0.158          |
| Do36l          | 0.165          |
| Do36s          | 0.158          |
| q-Chitosan [1] | 0.214          |
| PDADMAC [2]    | 0.213          |

#### 5. The Stretched Length of the Polycations

The contour length of PDADMAC is calculated as

$$L = \frac{M_w * l}{M_{w,mon}} = \frac{150000 \frac{g}{mol} * 0.50 \text{ nm}}{161.67 \text{ g/mol}} = 464 \text{ nm}$$

Where  $M_{w,mon}$  and  $l$  are the DADMAC monomer molecular weight and a unit length, respectively and  $M_w$  is the molecular weight of PDADMAC.

The stretched length of Chitosan is calculated as

$$L = \frac{M_w * l}{M_{w,ring}} = \frac{130000 \text{ g/mol} * 0.57 \text{ nm}}{168.9 \text{ g/mol}} = 439 \text{ nm}$$

Where  $M_{w,ring}$  and  $l$  are the molecular weight and the length of the averaged sugar ring of the Chitosan, respectively and  $M_w$  is the molecular weight of the original purified Chitosan.

## 6. Small Angle Neutron Scattering

### 6.1. SLD of the Complexes

SLDs of the complexes ( $SLD_{comp}$ ) were calculated from the sum of the volume fractions  $\Phi_i$  of the polyanion or the polycation multiplied with the SLD of the corresponding part ( $i$ )

$$SLD_{comp} = \sum_i (\phi_i * SLD_i) \quad (S2)$$

The assumption of 1:1 IPECs is the hydrophobic core added on the polycation and the hydrophilic chain of polyanion with respect to the amount of added polycation.

**Table S3.** SLD of the complexes

| Complexes |            | z=[+]/[-] | $SLD_{comp}$ [Å <sup>-2</sup> ] |
|-----------|------------|-----------|---------------------------------|
| Bu40      | PDADMAC    | 0.1       | 1.192E-06                       |
|           |            | 0.2       | 1.110E-06                       |
|           |            | 0.3       | 1.045E-06                       |
|           |            | 0.4       | 9.928E-07                       |
| Do36s     |            | 0.1       | 7.375E-07                       |
|           |            | 0.2       | 7.208E-07                       |
|           |            | 0.3       | 7.063E-07                       |
|           |            | 0.4       | 6.936E-07                       |
| Bu40      | q-Chitosan | 0.1       | 1.302E-06                       |
|           |            | 0.2       | 1.303E-06                       |
|           |            | 0.3       | 1.304E-06                       |
|           |            | 0.4       | 1.304E-06                       |
| Do36s     |            | 0.1       | 8.315E-07                       |
|           |            | 0.2       | 8.882E-07                       |
|           |            | 0.3       | 9.329E-07                       |
|           |            | 0.4       | 9.690E-07                       |

## 6.2. The correction of the SANS data

The correction was done with respect to the differences between reference TTAB measurement.

$$I_{\max\_HZB} / I_{\max\_LLB} = I\_shiftfactor = 1.408462$$

$$q_{\max\_HZB}(\text{at } I_{\max}) / q_{\max\_LLB}(\text{at } I_{\max}) = q\_shiftfactor = 0.927534$$

All LLB data was multiplied with the shift factor correspondingly and after that the corrected data was used for the characterization of complexes. The data from HZB was shown with \* in Figure 6.

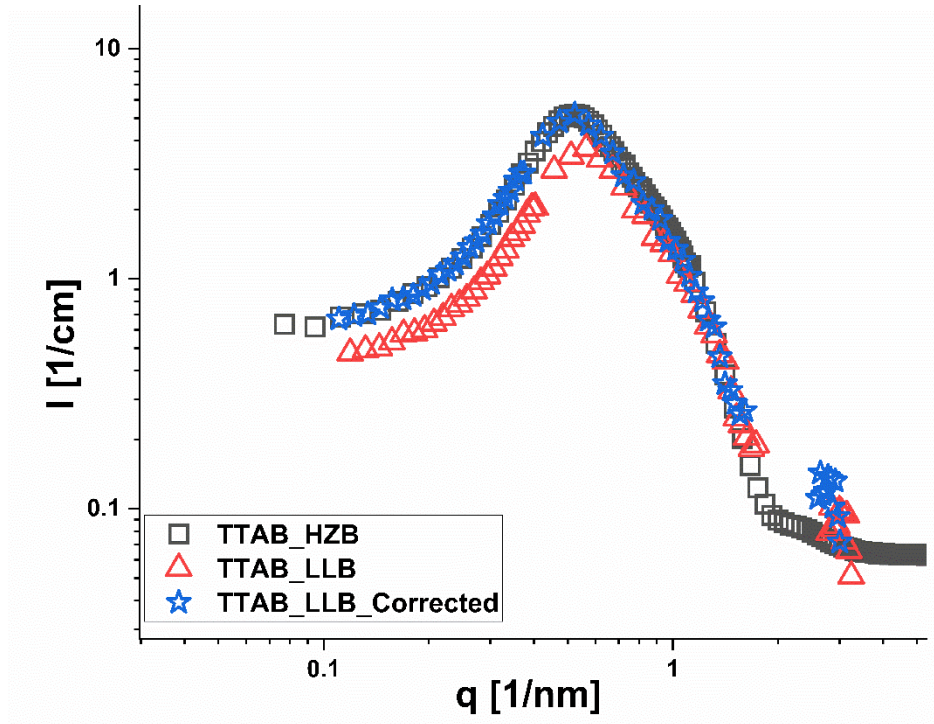

**Figure S3.** The measured TTAB reference sample at the facilities HZB (dark grey), LLB (red) and the corrected LLB data (blue).

## 6.3. Model Free Analysis- Guinier Approximation

Model-free analysis of SANS curves, yielding the extrapolated intensity by Guinier approximation at zero-scattering angle,  $I(0)$ , the resulting apparent molecular weight  $M_w$  calculated via

$$M_w = \frac{I(0) \cdot d^2 \cdot N_{av}}{c \cdot \Delta SLD^2} \quad (S3)$$

where  $c$  is the concentration which was the sum of the added polycation with respect to desired  $z$  ratio onto the constant 5 g/L polyanion aggregates.

Molecular weight of Polyanion ( $M_w\_PA$ ) and Polycation ( $M_w\_PC$ ) can be found in 2.1. Materials Part and Table 1 in the main text.

$f[-]$  and  $f[+]$  are the mol fraction of whole Polyanion and Polycation in complexes. Molecular weight of the complexes was calculated as follows.

$$M_{w\_comp} = f[-] M_{w\_PA} + f[+] M_{w\_PC} \quad (S4)$$

Aggregation number of the complexes ( $N_{agg\_comp}$ ) are calculated from  $M_w$  of the complex (from Equation S3) and the  $M_{w\_comp}$  (from Equation S4)

$$N_{agg} = \frac{M_w}{M_{w\_comp}} \quad (S5)$$

Aggregation number of corresponding Polyanion ( $N_{agg} [-]$ ) and Polycation ( $N_{agg} [ + ]$ ) in complexes is calculated

$$N_{agg} [-] = f[-] N_{agg\_comp} \quad (S6)$$

$$N_{agg} [ + ] = f[ + ] N_{agg\_comp} \quad (S7)$$

Assuming the aggregates as spherical, volume of the aggregates ( $V$ ) with a radius of gyration ( $R_g$ )

$$V = \frac{4}{3} \pi R_g^3 \quad (S8)$$

The effective density of the complexes ( $\rho_{eff}$ ) can be calculated with the following equation S9

$$\rho_{eff} = \frac{M_w}{V * N_{av}} \quad (S9)$$

where  $N_{av}$  is the Avogadro number.

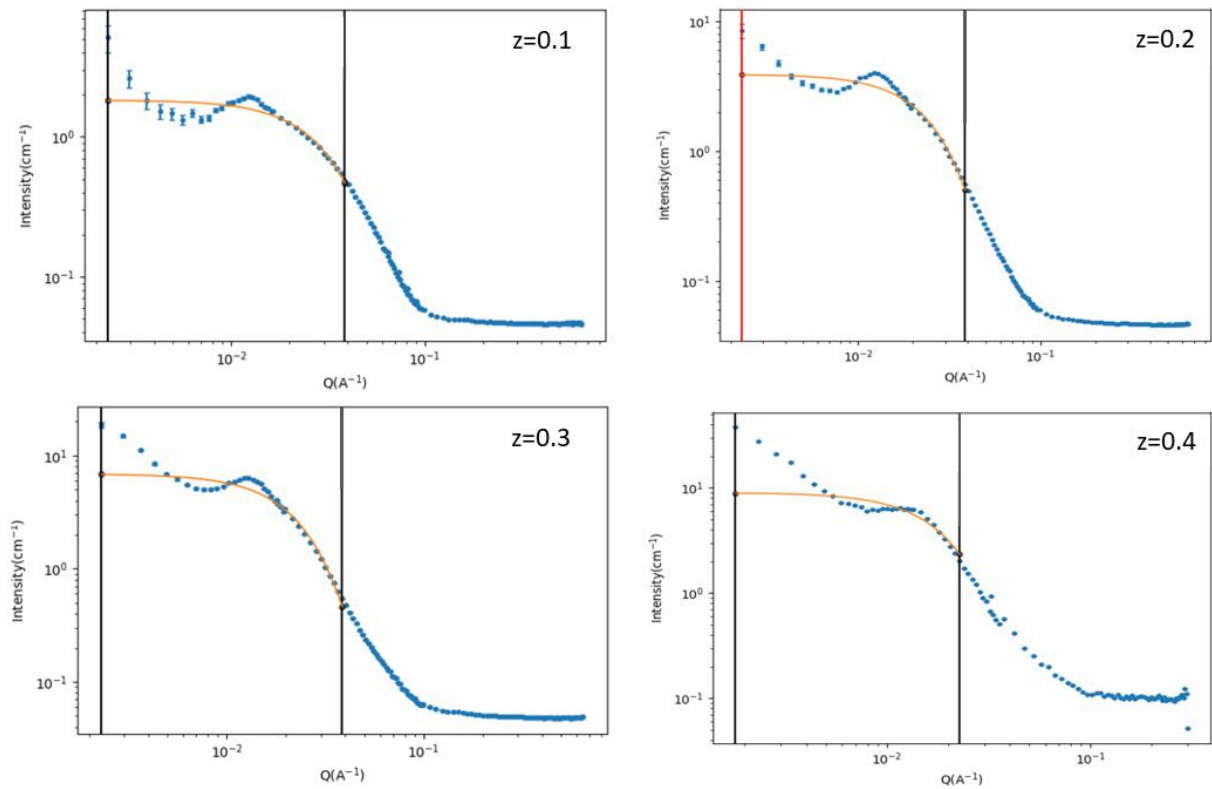

**Figure S4.** The Guinier approximation plots for Bu40 Complexes with q-Chitosan at different charge ratios  $z$  (the fitted  $q$  range  $\sim 0.01$ - $0.03 \text{ \AA}^{-1}$ ).

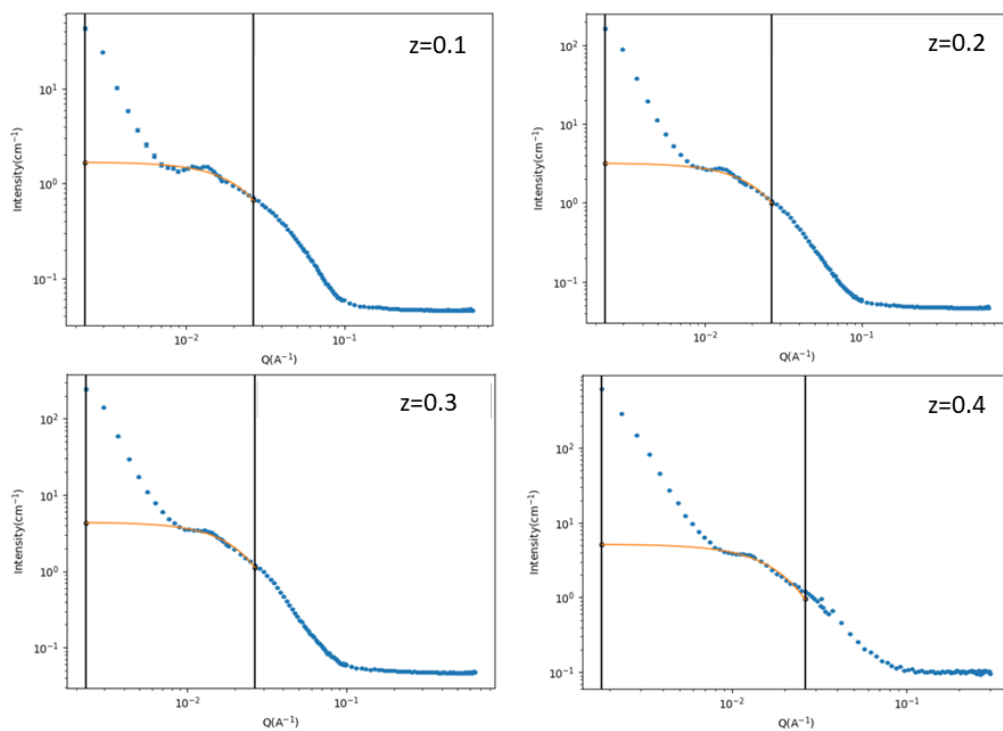

**Figure S5.** The Guinier approximation plots for Bu40 Complexes with PDADMAC at different charge ratios  $z$  (the fitted  $q$  range  $\sim 0.01$ - $0.02 \text{ \AA}^{-1}$ ).

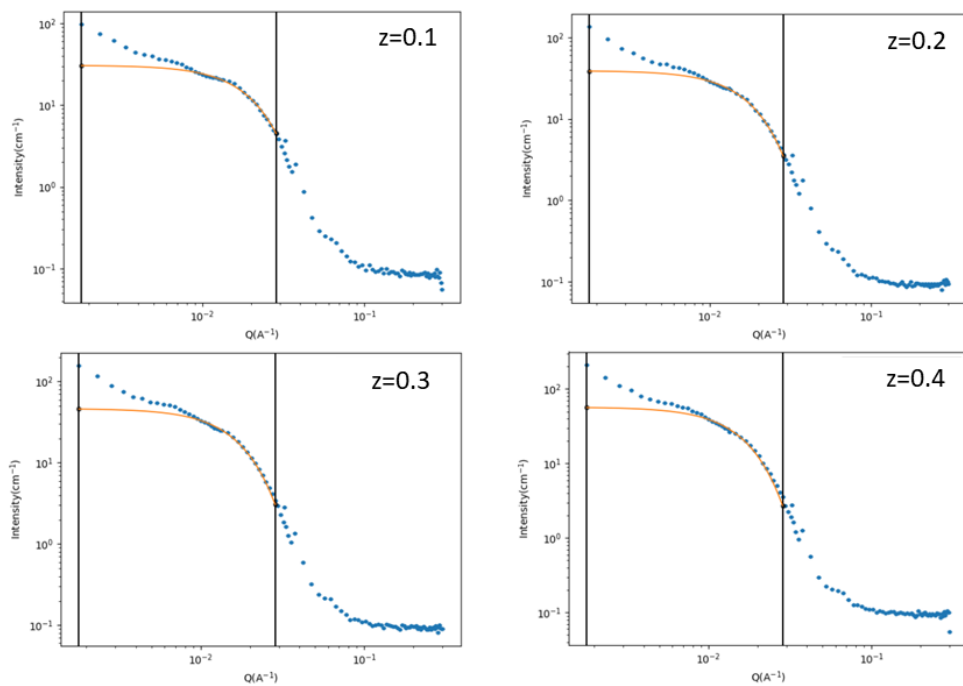

**Figure S6.** The Guinier approximation plots for Do36s Complexes with q-Chitosan at different charge ratios  $z$  (the fitted  $q$  range  $\sim 0.009$ - $0.03 \text{ \AA}^{-1}$ ).



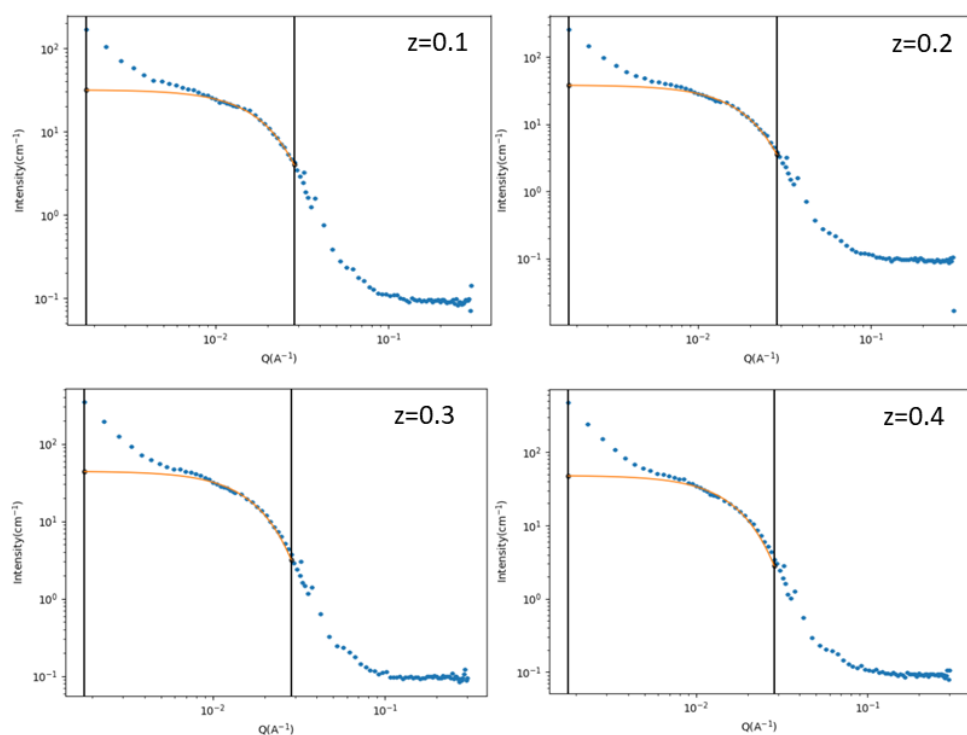

**Figure S7.** The Guinier approximation plots for Do36s Complexes with PDADMAC at different charge ratios  $z$  (the fitted  $q$  range  $\sim 0.009$ - $0.03 \text{ \AA}^{-1}$ ).

#### 6.4. Slope at lower $q$ for the Bu40 Complexes - The Power Law

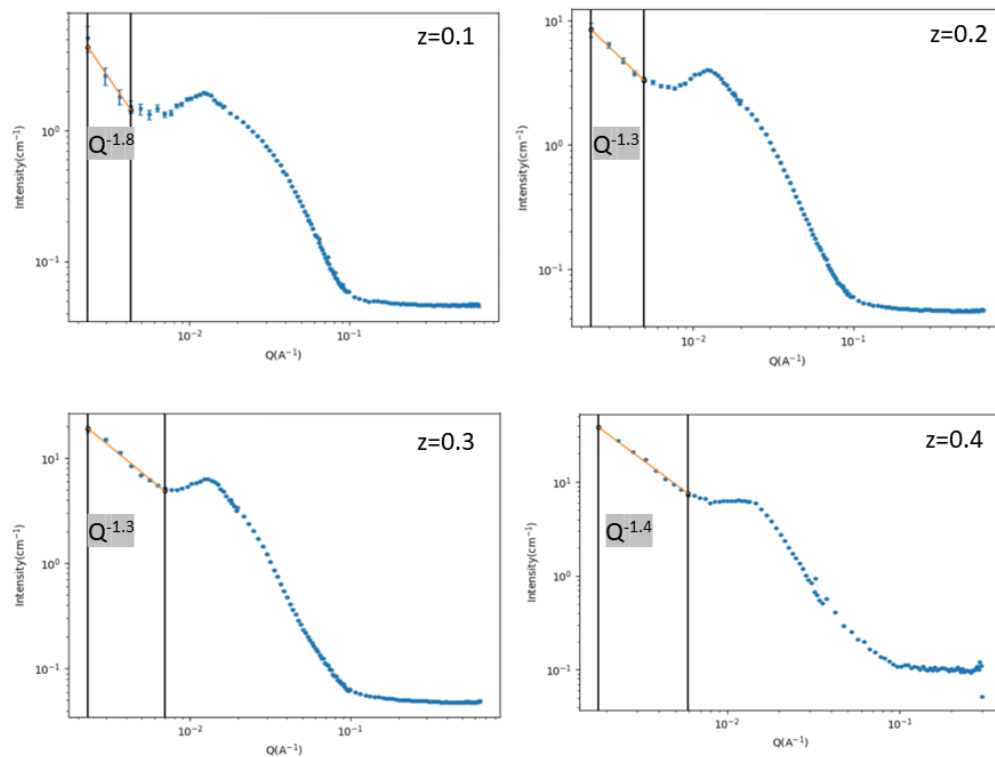

**Figure S8.** The Power Law plots for Bu40 Complexes with q-Chitosan at different charge ratios  $z$ .

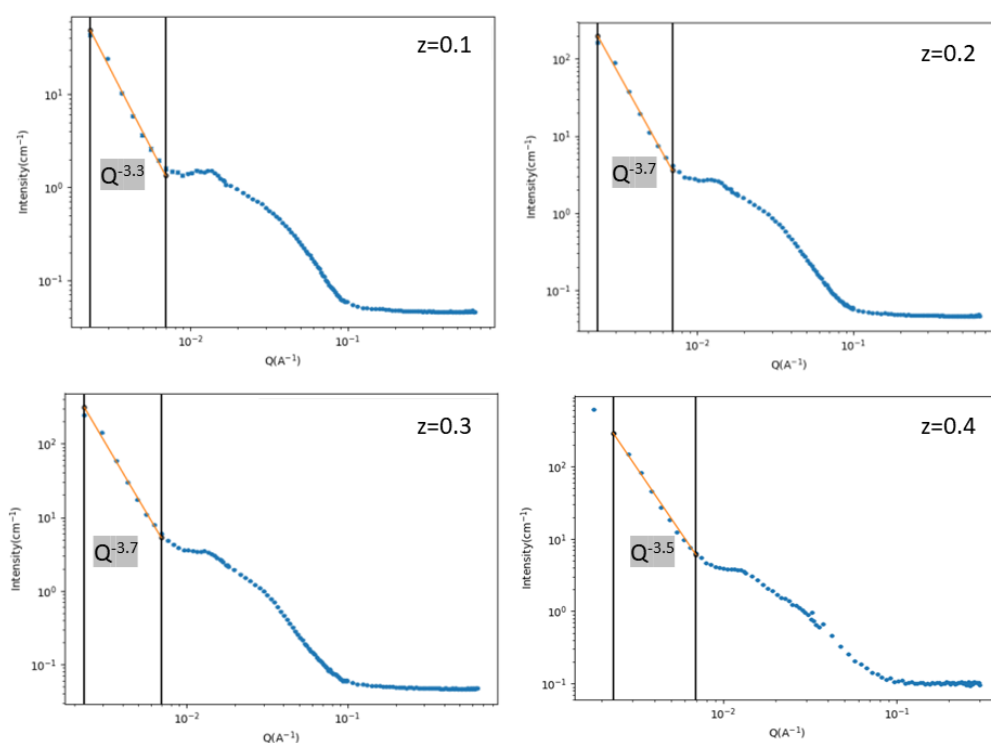

**Figure S9.** The Power Law plots for Bu40 Complexes with PDADMAC at different charge ratios  $z$  [1,2].

## 7. Viscosity measurements of Bu40 Complexes

**Table S4.** Viscosity measurements of Bu40 Complexes.

| Bu40 Complexes | $z=[+]/[-]$ | $\nu$ [mm <sup>2</sup> /s] | $\eta$ [mPas] |
|----------------|-------------|----------------------------|---------------|
| with q-Chit    | 0.2         | 1.55                       | 1.72          |
|                | 0.4         | 1.50                       | 1.67          |
| with PDADMAC   | 0.2         | 3.18                       | 3.52          |
|                | 0.4         | 3.15                       | 3.49          |

## 8. Some pictures of the obtained solutions

|         | Bu40                                                                              | Do36s                                                                              |
|---------|-----------------------------------------------------------------------------------|------------------------------------------------------------------------------------|
| q-Chit  | 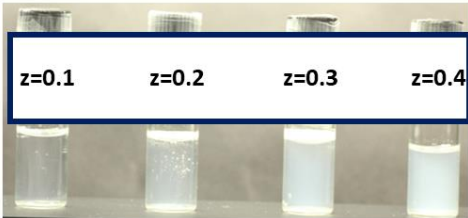 |  |
| PDADMAC |  |  |

## References

1. Chiappisi, L.; Prévost, S.; Grillo, I.; Gradzielski, M. Chitosan/Alkylethoxy Carboxylates: A Surprising Variety of Structures. *Langmuir* **2014**, *30*, 1778–1787, doi:10.1021/la404718e.
2. Guzmán, E.; Ritacco, H.; Ortega, F.; Svitova, T.; Radke, C.J.; Rubio, R.G. Adsorption Kinetics and Mechanical Properties of Ultrathin Polyelectrolyte Multilayers: Liquid-Supported versus Solid-Supported Films. *J. Phys. Chem. B* **2009**, *113*, 7128–7137, doi:10.1021/jp811178a.
